# Supplementary material
Source: publisher figshare collection journal article supplement (https://acs.figshare.com/ndownloader/files/5677722)
Supplement: Supplementary file 1 [file 5677722]

Supporting Information for

# Novel Sandwich Coordination Polymers Composed of Cobalt (II), 1,2,4,5- Benzenetetracarboxylato Ligands and Homopiperazonium Cations

*Deping Cheng, Masood A. Khan, and Robert P. Houser\**

Department of Chemistry and Biochemistry, University of Oklahoma, 620 Parrington  
Oval, Norman, Oklahoma 73019

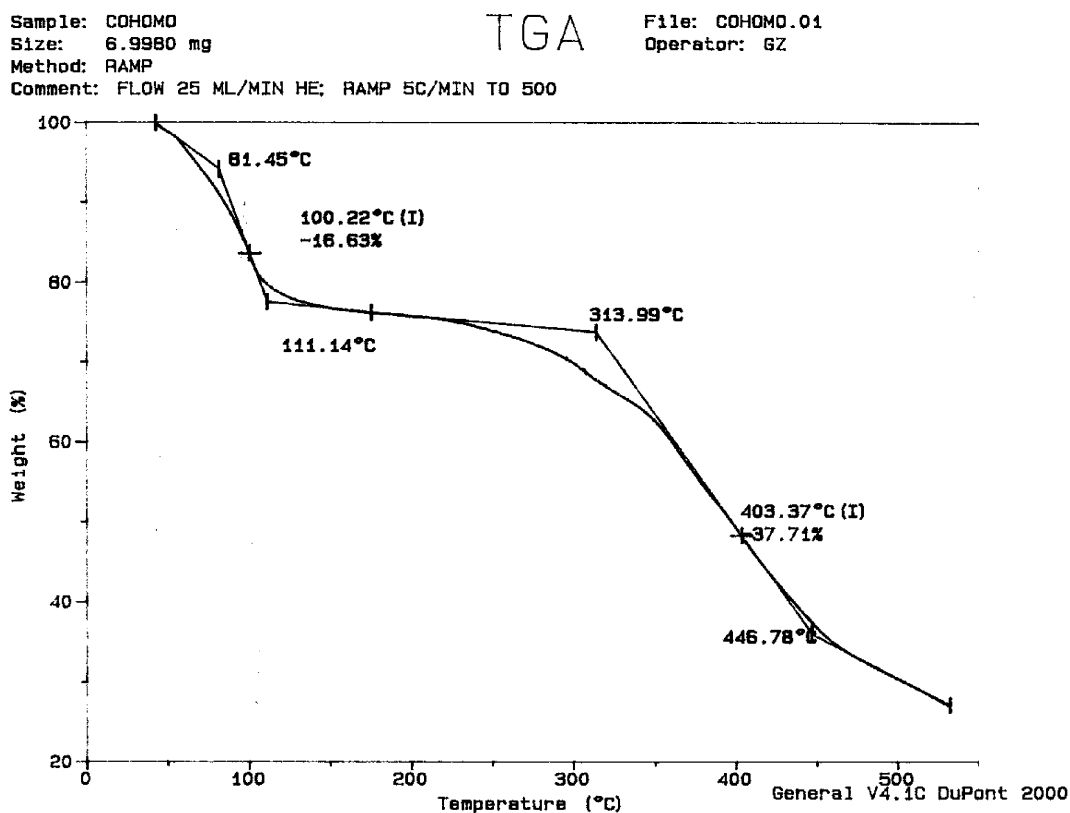

**Figure S1.** Thermal gravimetric analysis (TGA) of  $(\text{H}_4\text{hpz})[\text{Co}_3(\text{BTEC})_2(\text{H}_2\text{O})_{12}] \cdot 11\text{H}_2\text{O}$  (**1**).

TGA

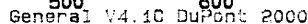

**Figure S2.** Thermal gravimetric analysis of  $(\text{H}_4\text{hpz})[\text{Co}(\text{BTEC})(\text{H}_2\text{O})_3]\cdot 3\text{H}_2\text{O}$  (**2**).

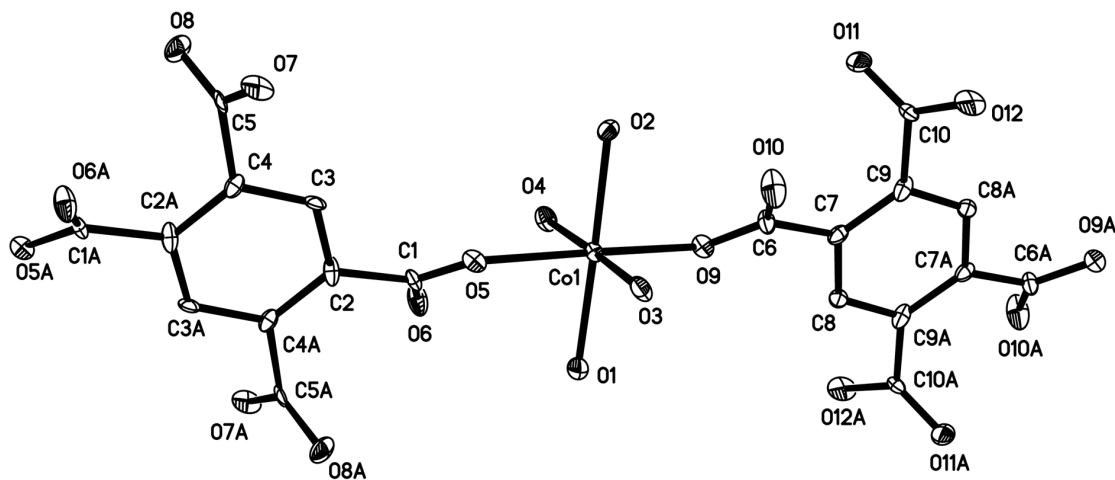

**Figure S3.** Molecular structure represented as 50% thermal ellipsoids of a portion of the polymeric 1D chains of **1**. H atoms omitted for clarity.
